# Supplementary material for: A succinct access to ω-hydroxylated jasmonates via olefin metathesis
Source: publisher site journal article supplement (doi:10.1515/znc-2017-0104), 2017-06-29
Supplement: Supplementary file 1 [file znc-2017-0104_suppl.docx]

***Supplementary Material***

**A succinct access to ω-hydroxylated jasmonates via olefin metathesis**

**Guillermo H. Jimenez-Aleman*, Selina Seçinti, Wilhelm Boland***

Guillermo H. Jimenez-Aleman: [**gjimenez-aleman@ice.mpg.de**](mailto:gjimenez-aleman@ice.mpg.de)

Wilhelm Boland**:** [**boland@ice.mpg.de**](mailto:boland@ice.mpg.de)

Table of Contents

[Determination of GC-MS response factor (RF) for 15b. 1](#_Toc476314120)

[Typical chromatograms obtained for 15b 3](#_Toc476314121)

[Typical chromatograms obtained for 15b. Experiments corresponding to Figure 5. 4](#_Toc476314122)

[Typical chromatograms obtained for 15c. Experiments corresponding to Figure 5. 5](#_Toc476314123)

[Typical chromatograms obtained for 15d. Experiments corresponding to Figure 5. 6](#_Toc476314124)

[Figure S1. 7](#_Toc476314125)

[HRMS spectrum of 15b 8](#_Toc476314126)

[1H NMR of 15b in CDCl3. 9](#_Toc476314127)

[13C NMR of 15b in CDCl3. 10](#_Toc476314128)

[HRMS of 15e 11](#_Toc476314129)

[1H NMR of 15e in CDCl3. 12](#_Toc476314130)

[13C NMR of 15e in CDCl3. 13](#_Toc476314131)

# Determination of GC-MS response factor (RF) for 15b.

A stock solution of **15b** (0.01 M) was prepared by dissolving **15b** (14 mg, 0.05 mmol) in 5 mL of ethyl vinyl ether (3M in DCM) in a 5 mL volumetric flask. From the stock solution, standard solutions of **15b** (0.001 M, 0.002 M and 0.005 M) were prepared similarly to the stock solution, and GS-MS were measured by injecting 1 μL of each standard solution. The response factor was determined from the slope (RF = 581440533) and the conversion to **15b** calculated from the equation below:

# Typical chromatograms obtained for 15b

(A) with Grubbs 2nd generation catalyst **11**; (B) with Hoveyda-Grubbs 2nd generation catalyst **12**; (C) with Grubbs *Z*-selective catalyst **13**.

# Typical chromatograms obtained for 15b. Experiments Table 3.

# Typical chromatograms obtained for 15c. Experiments Table 3.

# Typical chromatograms obtained for 15d. Experiments Table 3.

# Figure S1.

***Figure S1***. (A) CM of **4** and **14b** (6 equiv.) using catalyst **13** (7 mol %). No reaction observed. (B) catalyst **11** (3 mol %). The peak for the starting substrate **4** disappeared, yielding the expected CM product. Solvent free conditions at 60 °C; GC-MS chromatograms of derivatized samples after 24 h reaction.

# HRMS spectrum of 15b

# 1H NMR of 15b in CDCl3.

# 13C NMR of 15b in CDCl3.

# HRMS of 15e

# 1H NMR of 15e in CDCl3.

# 13C NMR of 15e in CDCl3.
